# Supplementary material
Source: publisher figshare collection journal article supplement (https://acs.figshare.com/ndownloader/files/7006331)
Supplement: Supplementary file 1 [file 7006331]

---

**Supporting Information for:**

**Glutathione Modified Gold Nanoparticles for  
Sensitive Colorimetric Detection of Pb<sup>2+</sup> ions  
in Rain Water Polluted by Leaking Perovskite  
Solar Cells**

*Yaming Yu<sup>a,b</sup>, Ying Hong<sup>a</sup>, Peng Gao<sup>b</sup>, Mohammad Khaja Nazeeruddin<sup>b</sup>*

a College of Materials Science and Engineering, Huaqiao University, 361021  
Xiamen, China

b Group for Molecular Engineering of Functional Materials, Institute of Chemical  
Science and Engineering, École Polytechnique Fédérale de Lausanne, CH-1950 Sion,  
Switzerland

**Contents**

**Table S1.** Determination of the Pb contents from the active layer rinsed from the cell panels.

**Figure S1.** X-ray diffraction of PSCs films before (red line) and after (black line) water dipping.

(a) PSCs-1, (b) PSCs-2, and (C) PSCs-3.

**Figure S2.** Photographs for the self-assembled AuNPs sensing assay in the presence of various ions (4 μM) (a) and in the presence of Pb<sup>2+</sup> (4 μM) and another ion (X) (4 μM).

---

**Table S1.** Determination of the Pb contents from the active layer rinsed from the cell panels.

---

| samples | ICP-MS mmol/L, n=3, in 10ml water |            |            |            |            |            |
|---------|-----------------------------------|------------|------------|------------|------------|------------|
|         | pH=4.5                            |            |            | pH=5.6     |            |            |
|         | 1h                                | 3h         | 1d         | 1h         | 3h         | 1d         |
| PSCs-1  | 1.81±0.052                        | 1.92±0.023 | 2.47±0.058 | 0.87±0.032 | 0.88±0.074 | 2.68±0.069 |
| PSCs-2  | 1.74±0.040                        | 2.44±0.084 | 2.58±0.116 | 0.66±0.003 | 0.72±0.036 | 2.68±0.080 |
| PSCs-3  | 1.67±0.005                        | 1.73±0.026 | 2.40±0.015 | 0.63±0.006 | 0.71±0.013 | 2.10±0.027 |

---

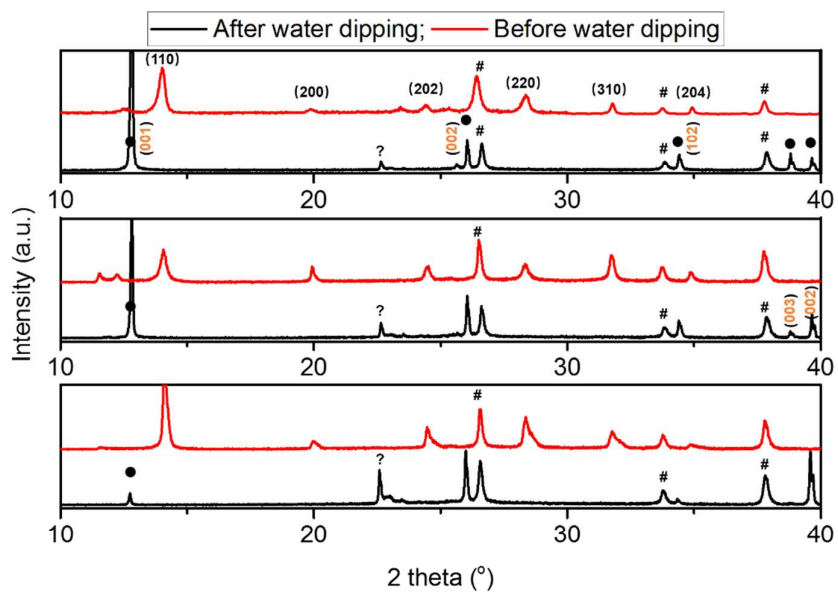

**Figure S1.** X-ray diffraction of PSCs films before (red line) and after (black line) water dipping. (a) PSCs-1, (b) PSCs-2, and (c) PSCs-3.

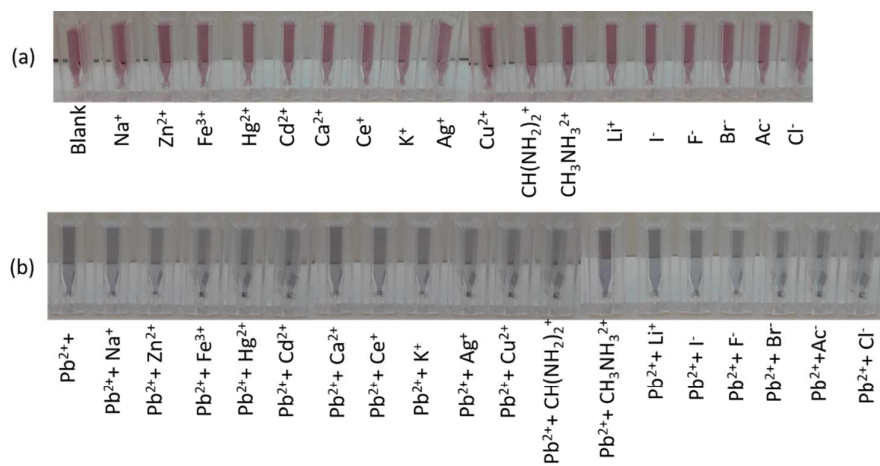

**Figure S2.** Photographs for the self-assembled AuNPs sensing assay in the presence of various ions (4  $\mu\text{M}$ ) (a) and in the presence of  $\text{Pb}^{2+}$  (4  $\mu\text{M}$ ) and another ion (X) (4  $\mu\text{M}$ ).
